# Supplementary material
Source: Springer Nature journal article supplement (https://www.springermedizin.de/resource/supplementary/12974_2010_253_MOESM7_ESM.pdf/9601098)
Supplement: MOESM7 [file 9601098]

## TABLES

**Table. 1 : Antibodies used for immunoblotting (IB) and immunohistochemistry (IHC)**

| Antibody                                | Antigen              | Host   | Company                                        | Catalog #       | folds                             |
|-----------------------------------------|----------------------|--------|------------------------------------------------|-----------------|-----------------------------------|
| <i>Primary antibody (clone #)</i>       |                      |        |                                                |                 |                                   |
| gp91 <sup>phox</sup>                    | Human gp91           | Rabbit | See ref 18                                     |                 | 4,000<br>(IB)<br><br>200<br>(IHC) |
| p22 <sup>phox</sup>                     | Human p22            | Rabbit | See ref 18                                     |                 | 3,000                             |
| iNOS                                    | Mouse iNOS           | Rabbit | Transduction Laboratories (Lexington, KY)      | N32030          | 10,000                            |
| Ym1                                     | Mouse Ym1            | Rabbit | StemCell Tech (Vancouver, BC, Canada)          | 01404           | 1,000                             |
| GAPDH (6C5)                             | Rabbit<br>GAPDH      | Mouse  | Chemicon International (Temecula, CA)          | MAB374          | 3,000                             |
| $\beta$ -Actin (AC-74)                  | Mouse $\beta$ -Actin | Mouse  | Sigma (St Louise, MO)                          | A5316           | 4,000                             |
| CD11b (5C6)                             | Mouse CD11b          | Rat    | Serotec (Oxford, UK)                           | MCA711          | 500                               |
| GFAP (G-A-5)                            | Mouse GFAP           | Mouse  | Sigma (St Louise, MO)                          | G3893           | 1000                              |
| NeuN                                    | Mouse NeuN           | Mouse  | Chemicon International (Temecula, CA)          | MAB377          | 1000                              |
| 3-NT                                    | Nitrated KLH         | Rabbit | Upstate Biotechnology (Lake Placid, NY)        | 06-284          | 100                               |
| <i>Secondary antibody (conjugation)</i> |                      |        |                                                |                 |                                   |
| Mouse IgG (HRP)                         | Mouse IgG            | Sheep  | GE Healthcare Bioscience (Little Chalfont, UK) | NA931           | 2,000                             |
| Rabbit IgG (HRP)                        | Rabbit IgG           | Donkey | GE Healthcare Bioscience (Little Chalfont, UK) | NA934           | 3,000                             |
| Rabbit IgG (biotinylated)               | Rabbit IgG           | Goat   | Santa Cruz Biotechnology (Santa Cruz, CA)      | SC-2040         | 200                               |
| Mouse IgG (Alexa 546)                   | Mouse IgG            | Goat   | Molecular Probes (Eugene, OR)                  | A11030          | 400                               |
| Rabbit IgG (Alexa 488 or 546)           | Rabbit IgG           | Goat   | Molecular Probes (Eugene, OR)                  | A11034<br>11035 | or<br>400                         |
| Rat IgG (Alexa 546)                     | Rat IgG              | Goat   | Molecular Probes (Eugene, OR)                  | A11081          | 400                               |
